# Supplementary material
Source: Frontiers journal article supplement (https://www.frontiersin.org/articles/401668)
Supplement: Table_1.pdf [file Table_1.pdf]

**Supplementary Table - 1**

| Wavenumber (cm <sup>-1</sup> ) | Assignment                                                                                                                     |
|--------------------------------|--------------------------------------------------------------------------------------------------------------------------------|
| 3328                           | Amide A: N-H and O-H stretching vibrations of polysaccharides, proteins                                                        |
| 3015                           | Olefin =CH stretching: unsaturated lipids, cholesterol esters                                                                  |
| 2960                           | CH <sub>3</sub> asymmetric stretching: mainly lipids with the little contribution from carbohydrates, proteins, nucleic acids. |
| 2920                           | CH <sub>3</sub> asymmetric stretching: mainly lipids                                                                           |
| 2875                           | CH <sub>3</sub> symmetric stretching: protein side chains, lipids                                                              |
| 2850                           | CH <sub>3</sub> symmetric stretching: mainly lipids                                                                            |
| 1720–1745                      | C=O stretching vibrations of lipids (triglycerides and cholesterol esters)                                                     |
| 1710–1690                      | C=O asymmetric stretching: RNA and purine base                                                                                 |
| 1705–1690                      | C=O asymmetric stretching vibrations: RNA, DNA                                                                                 |
| 1654                           | Amide I: C=O (80%) and C–N (10%) stretching, N–H (10%) bending vibrations: proteins $\alpha$ -helix                            |
| 1630–1640                      | Amide I: (80%) and C–N (10%) stretching, N–H (10%) bending vibrations: proteins $\beta$ -structure                             |
| 1610, 1578                     | C4-C5 and C=N stretching in imidazole ring of DNA, RNA<br>1515 Aromatic tyrosine ring                                          |
| 1540–1550                      | Amide II: N–H (60%) bending and C–N (40%) stretching vibrations:<br>proteins $\alpha$ -helix                                   |
| 1530                           | Amide II: N–H (60%) bending and C–N (40%) stretching vibrations:<br>proteins $\beta$ -structure                                |
| 1467                           | CH <sub>3</sub> bending vibrations: lipids and proteins                                                                        |
| 1455                           | CH <sub>3</sub> bending and CH <sub>2</sub> scissoring vibrations: lipids and proteins                                         |
| 1370–1400                      | COO <sup>-</sup> symmetric stretching and CH <sub>3</sub> bending vibrations: lipids, Proteins                                 |
| 1330–1200                      | Amide III: proteins                                                                                                            |
| 1230–1244                      | PO <sub>4</sub> <sup>3-</sup> antisymmetric stretching vibrations: RNA, DNA and phospholipids                                  |
| 1090-1080                      | PO <sub>4</sub> <sup>3-</sup> symmetric stretching vibrations: RNA, DNA                                                        |
| 1060, 1050                     | C–O stretching vibrations: deoxyribose/ribose DNA, RNA                                                                         |
| 996                            | RNA stretch and bend ring of uracil                                                                                            |
| 965                            | PO <sub>4</sub> <sup>3-</sup> symmetric stretch (DNA) and deoxyribose-phosphate skeletal motions                               |
